# Supplementary material for: Ratiometric molecular beacons based on the perylene bisimide as a dimeric internal DNA base substitution
Source: Royal Society of Chemistry journal article supplement (doi:10.1039/c1pp05091e), 2011-05-06
Supplement: c1pp05091e.pdf [file c1pp05091e.pdf]

# Ratiometric molecular beacons with absorption readout based on the perylene bisimide chromophore as an internal DNA base substitution

Florian Menacher,<sup>[a]</sup> and Hans-Achim Wagenknecht\*<sup>[a,b]</sup>

## Supporting Information

<sup>a</sup> University of Regensburg

Institute for Organic Chemistry

D-93040 Regensburg

Germany

Fax: +49-(0)941-943-4617

Email: achim.wagenknecht@chemie.uni-regensburg.de

<sup>b</sup> New address:

Karlsruhe Institute of Technology

Institute for Organic Chemistry

Fritz-Haber-Weg 6

76131 Karlsruhe

Fax: +49-(0)721-608-7486

E-mail: wagenknecht@kit.edu

### Table of Content Page

|                                      |   |
|--------------------------------------|---|
| Materials and Methods .....          | 2 |
| Preparation of oligonucleotides..... | 2 |
| Modified oligonucleotides.....       | 3 |
| DNA1 .....                           | 4 |
| DNA2 .....                           | 5 |
| DNA3 .....                           | 6 |

|                                  |    |
|----------------------------------|----|
| DNA4 .....                       | 7  |
| DNA9 .....                       | 8  |
| Titration Experiments.....       | 9  |
| Kinetics of hairpin opening..... | 14 |

## Materials and Methods

Chemicals were purchased from Aldrich, Alfa Aesar and Merck. Unmodified oligonucleotides were purchased from Metabion. T.l.c. was performed on Fluka silica gel 60 F254 coated aluminum foil. Flash chromatography was carried out with silica gel 60 from Aldrich (60–43  $\mu\text{m}$ ). Spectroscopic measurements were recorded in Na-P<sub>i</sub> buffer solution (10 mM) using quartzglass cuvettes (10 mm). Absorption spectra and the melting temperatures (2.5  $\mu\text{M}$  DNA, 250 mM NaCl, 10–90 °C, 0.7 °C/min, step width 0.5 °C) were recorded with a Varian Cary 100 spectrometer equipped with a 6 x 6 cell changer unit. Fluorescence was measured with a Jobin–Yvon Fluoromax 3 fluorimeter with a step width of 1 nm and an integration time of 0.2 s. All spectra were recorded with an excitation and emission bandpass of 6 nm and are corrected for Raman emission from the buffer solution.

## Preparation of oligonucleotides

Oligonucleotides were prepared on an Expedite 8909 Synthesizer from Applied Biosystems (ABI) using standard phosphoramidite chemistry. For the PBI phosphoramidite the coupling time was enhanced from 96 s to 1500 s. To avoid precipitation during DNA synthesis, the PBI phosphoramidite was dissolved in CH<sub>2</sub>Cl<sub>2</sub>. Reagents and CPG (1  $\mu\text{mol}$ ) were purchased from ABI and Glen Research. After preparation, the trityl-off oligonucleotide was cleaved off the resin and deprotected by treatment with conc. NH<sub>4</sub>OH at r.t. for 24 hours. The oligonucleotide was dried and purified by HPLC on a RP-C18 column using the following conditions: A = NH<sub>4</sub>OAc buffer (50 mM; pH 6.5); B = acetonitrile, flow rate 2.5 mL/min, UV detection at 260 nm (DNA) and at 548 nm (PBI). The oligonucleotides were lyophilized and quantified by their absorbance at 528 nm in DMSO ( $\epsilon = 62500 \text{ M}^{-1}\text{cm}^{-1}$ ) on a Varian Cary 100 spectrometer.

## Modified oligonucleotides

**Table S1** Sequences of MBs and target oligonucleotides

| DNA          | Sequence (3'→5')                                     |
|--------------|------------------------------------------------------|
| <b>DNA1</b>  | <u>APBICTAATTTGACCGTACGTCAGTTGACTGGTCAAATTAPBICT</u> |
| <b>DNA2</b>  | <u>APBICTAATGTACGTCAGTTGACTATTAPBICT</u>             |
| <b>DNA3</b>  | <u>APBICAAGTACGTCAGTTGACTTTTPBICT</u>                |
| <b>DNA4</b>  | <u>APBICACGTACGTCAGTTGACTTTTPBICT</u>                |
| <b>DNA5</b>  | ACTGGCATGCAGTCAACTGACCAG                             |
| <b>DNA6</b>  | TAATAGTCAACTGACGTACATTA                              |
| <b>DNA7</b>  | AAAGTCAACTGACGTA                                     |
| <b>DNA8</b>  | AAGTCAACTGACGTACG                                    |
| <b>DNA9</b>  | <u>APBITAATCTTATAGTAGAAACCACAAAGTAATTAPBICT</u>      |
| <b>DNA10</b> | TACTTTGTGGTTTCTACTATAAG                              |

**Table S2** Characterization of the PBI-modified oligonucleotides

| DNA          | $\epsilon_{528 \text{ nm}}$<br>[mol L <sup>-1</sup> cm <sup>-1</sup> ] | Mass calcd<br>[Da] | Mass found<br>[Da]          |
|--------------|------------------------------------------------------------------------|--------------------|-----------------------------|
| <b>DNA 1</b> | 125 000                                                                | 13226.4            | 1469.3 [M-9H] <sup>9-</sup> |
|              |                                                                        |                    | 1653.4 [M-8H] <sup>8-</sup> |
|              |                                                                        |                    | 1889.7 [M-7H] <sup>7-</sup> |
|              |                                                                        |                    | 2205.0 [M-6H] <sup>6-</sup> |
| <b>DNA 2</b> | 125 000                                                                | 9520.8             | 1586.6 [M-6H] <sup>6-</sup> |
|              |                                                                        |                    | 1904.3 [M-5H] <sup>5-</sup> |
|              |                                                                        |                    | 2380.8 [M-4H] <sup>4-</sup> |
| <b>DNA 3</b> | 125 000                                                                | 8286.6             | 1382.9 [M+6H] <sup>6+</sup> |
|              |                                                                        |                    | 1659.5 [M+5H] <sup>5+</sup> |
|              |                                                                        |                    | 2074.1 [M+4H] <sup>4+</sup> |
| <b>DNA4</b>  | 125 000                                                                | 8262.6             | 1377.0 [M-6H] <sup>6-</sup> |
|              |                                                                        |                    | 1652.6 [M-5H] <sup>5-</sup> |
|              |                                                                        |                    | 2066.0 [M-4H] <sup>4-</sup> |
| <b>DNA9</b>  | 125 000                                                                | 11985.3            | 1498.2 [M-8H] <sup>8-</sup> |
|              |                                                                        |                    | 1712.5 [M-7H] <sup>7-</sup> |
|              |                                                                        |                    | 1998.2 [M-6H] <sup>6-</sup> |
|              |                                                                        |                    | 2398.1 [M-5H] <sup>5-</sup> |

## DNA1

3'-APBICTAATTTGACCGTACGTCAGTTGACTGGTCAAATTAPBICT-5'

## HPLC

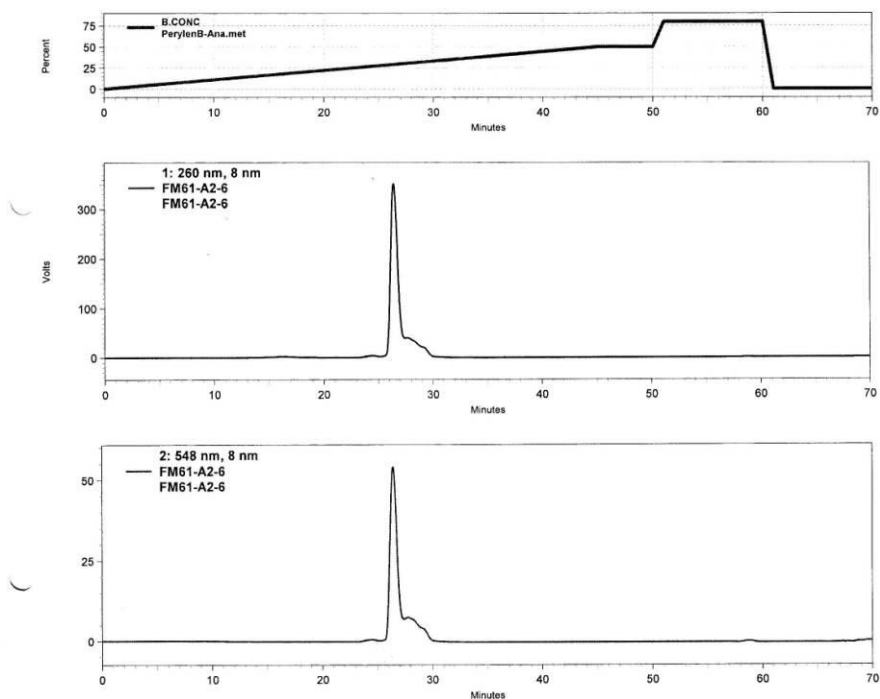

## ESI-MS

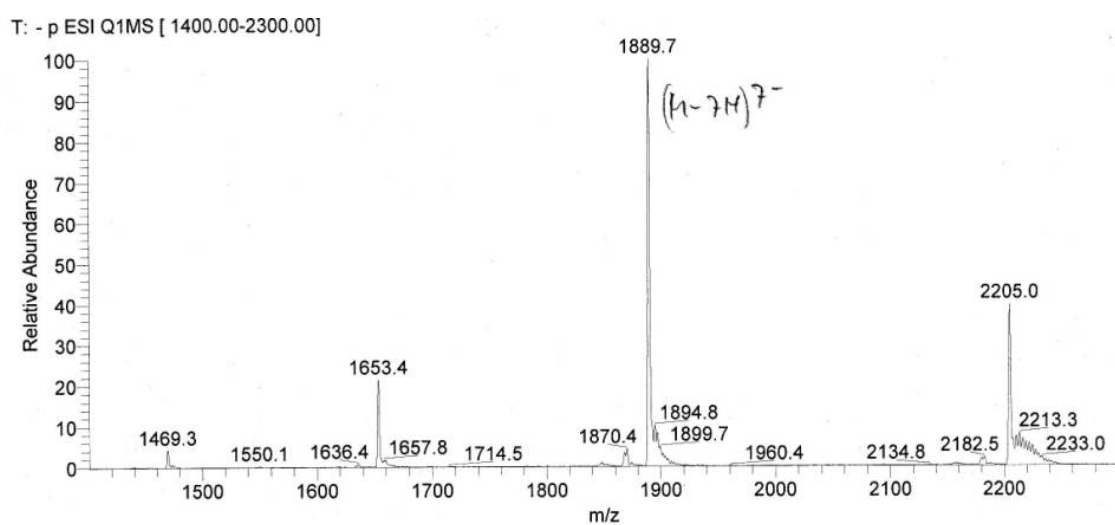

## DNA2

3'-APBICTAATGTACGTCAGTTGACTATTAPBICT-5'

## HPLC

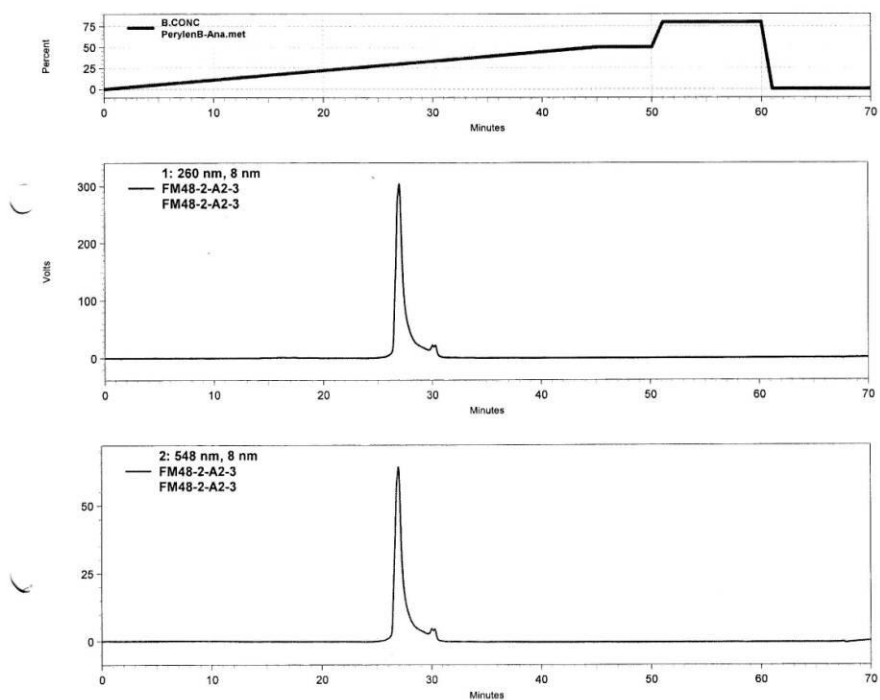

## ESI-MS

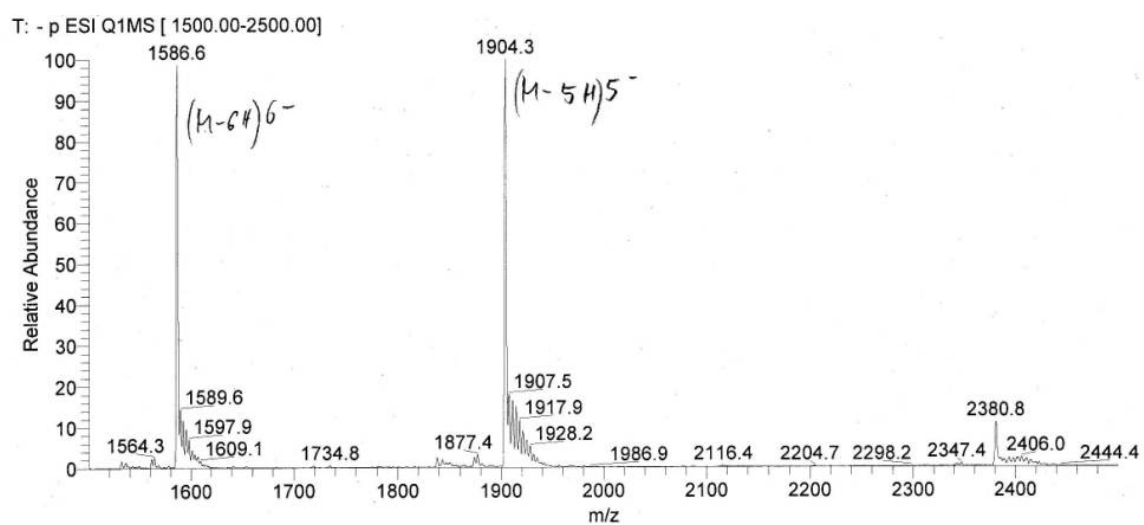

## DNA3

3'-APBICAAGTACGTCAGTTGACTTTPBICT-5'

## HPLC

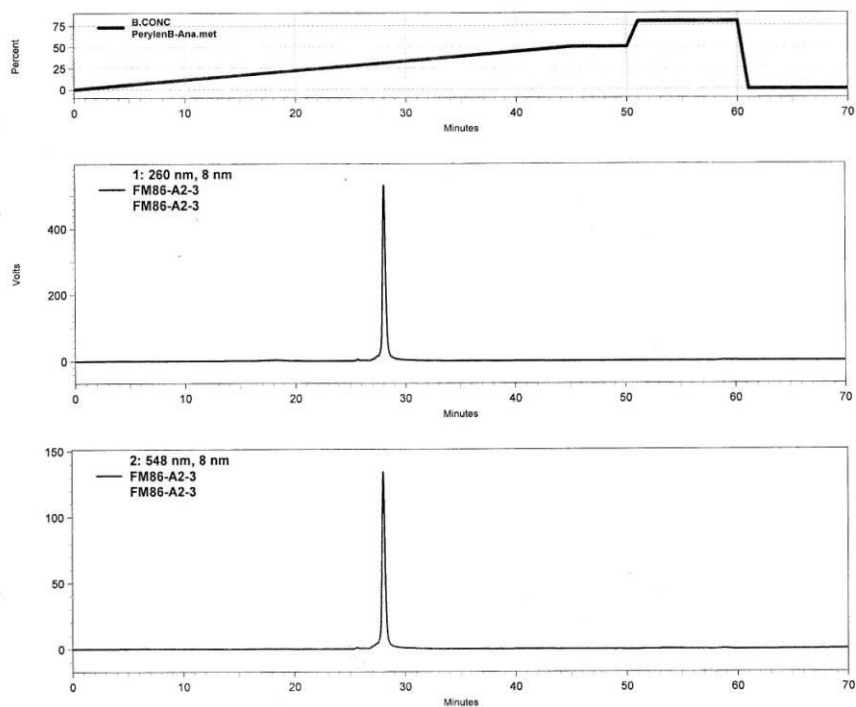

## ESI-MS

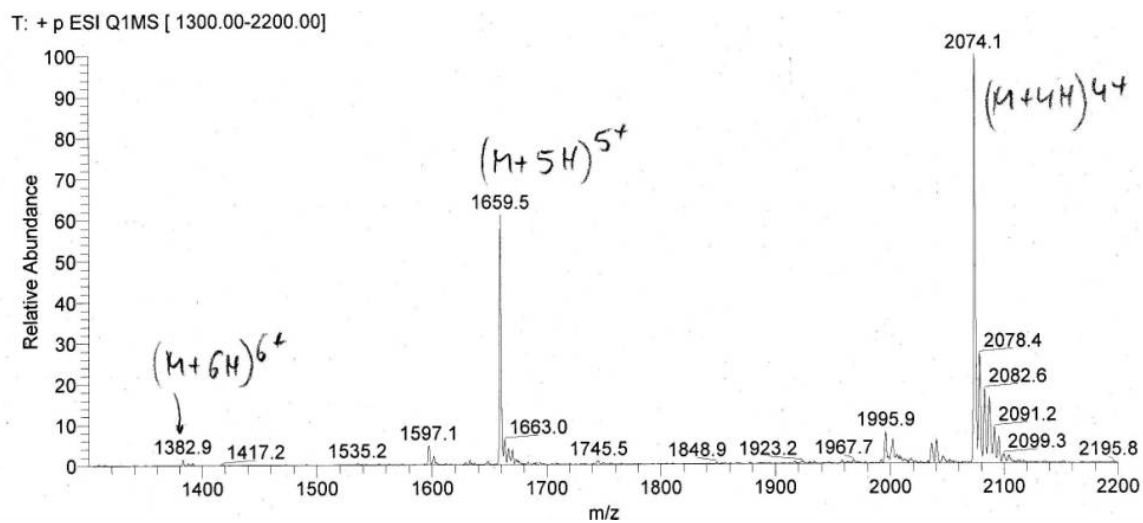

## DNA4

3'-APBICACGTACGTCAGTTGACTTTPBICT-5'

## HPLC

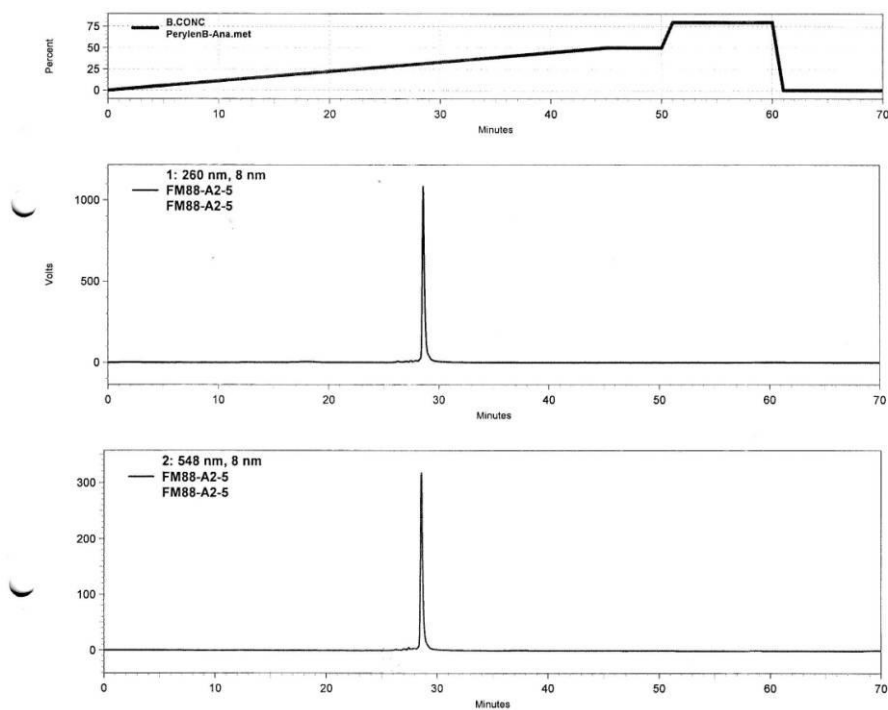

## ESI-MS

T: -p ESI Q1MS [1300.00-2200.00]

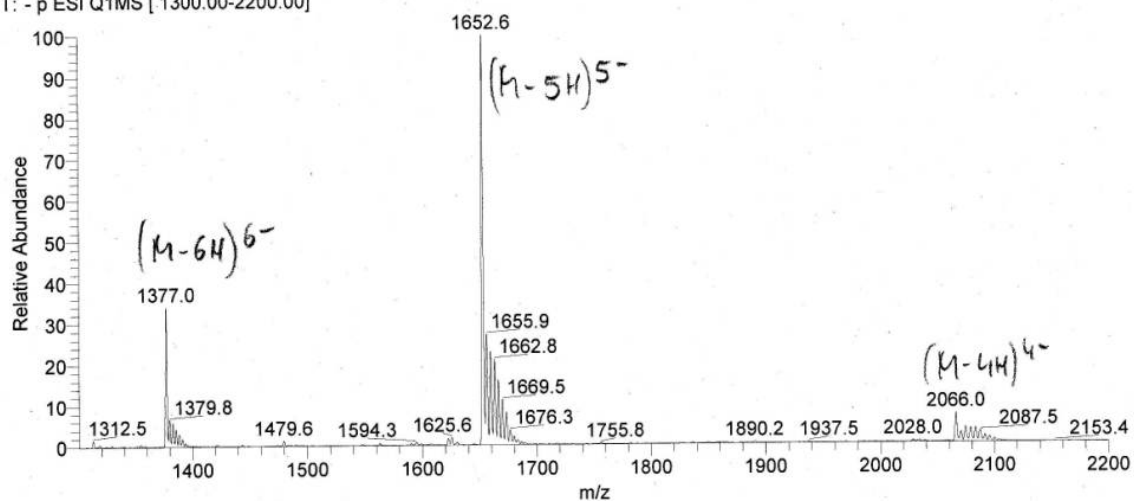

## DNA9

3'-APBI-TAA-TCT-TAT-AGT-AGA-AAC-CAC-AAA-GTA-ATT-APBIC-T-5'

## HPLC

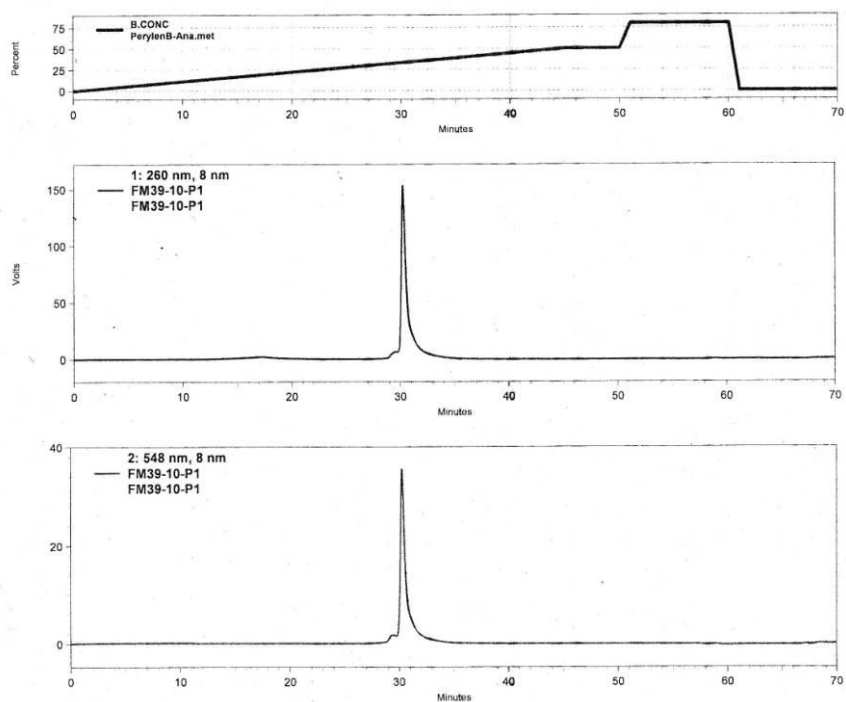

## ESI-MS

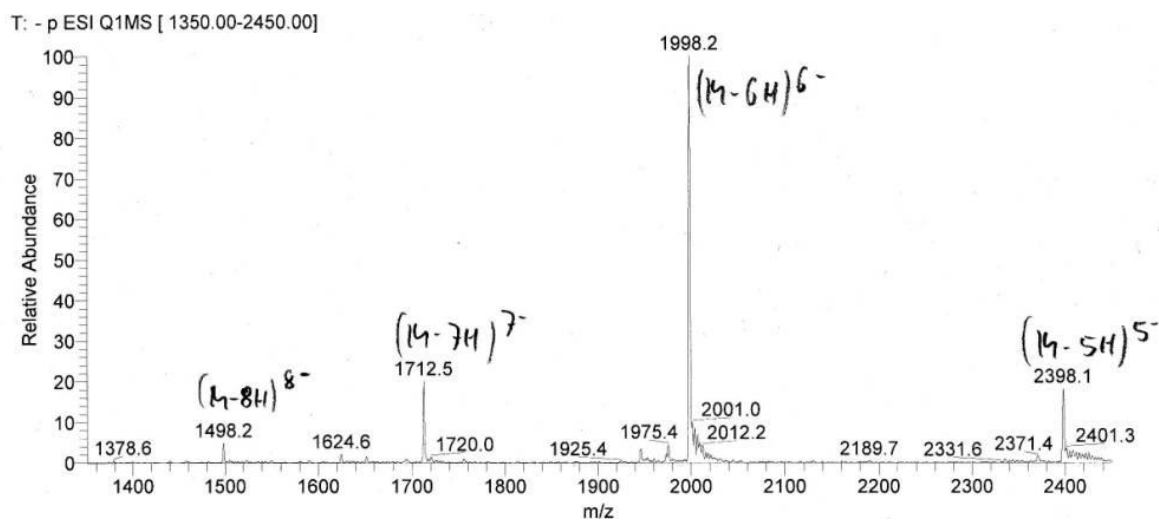



## Titration Experiments

### DNA3-7

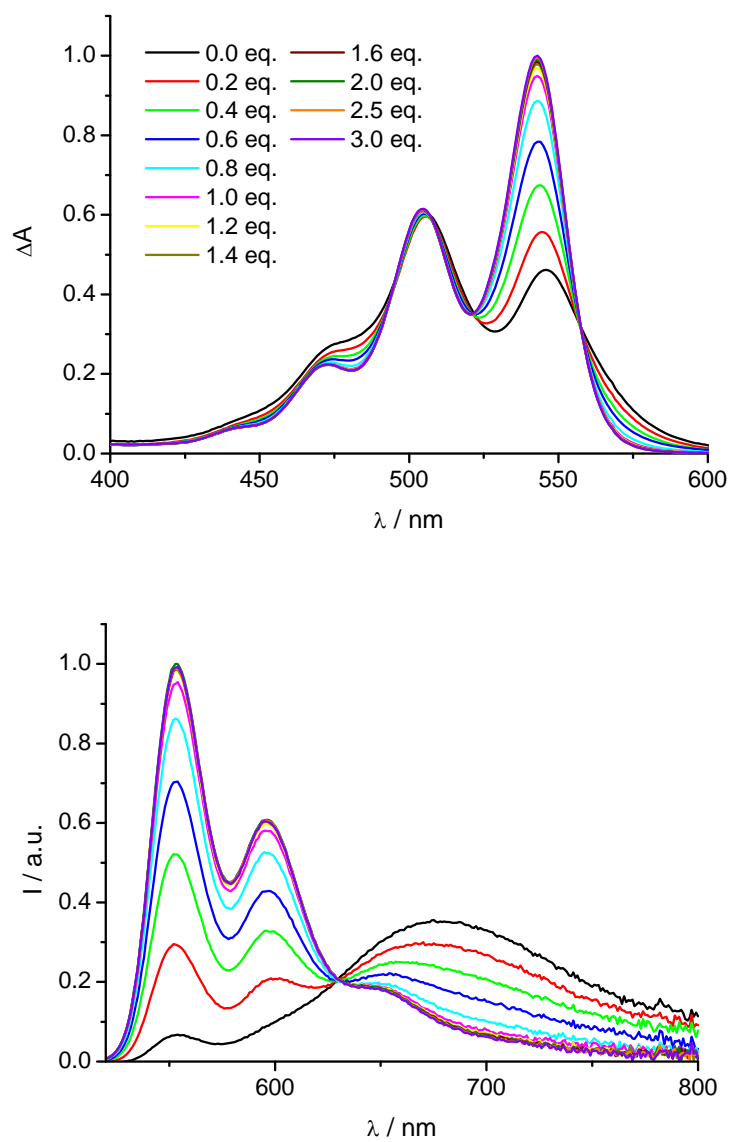

**Fig. S1** Normalized UV/Vis absorption (top) and emission spectra of the titration of **DNA3** with **DNA7**, 2.5  $\mu\text{M}$  DNA in 10 mM  $\text{NaP}_i$ -buffer, pH 7, 250 mM NaCl,  $\lambda_{\text{exc}} = 505$  nm.

## DNA4-8

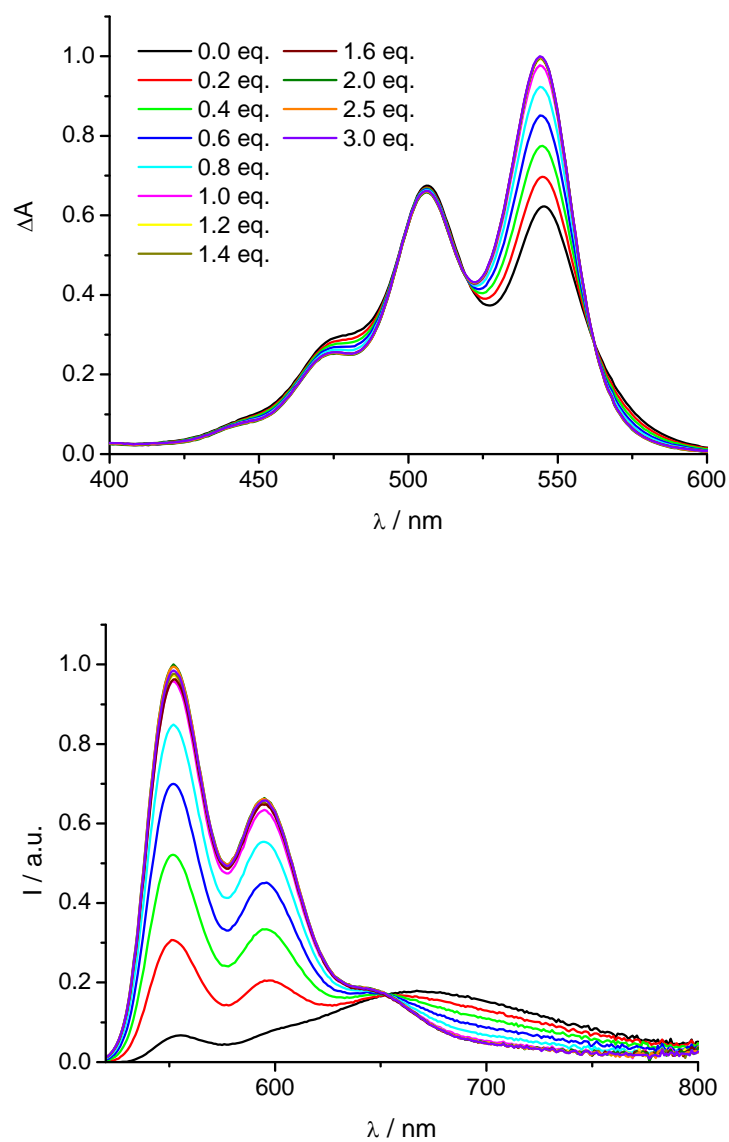

**Fig. S2** Normalized UV/Vis absorption (top) and emission spectra of the titration of **DNA4** with **DNA8**, 2.5  $\mu\text{M}$  DNA in 10 mM  $\text{NaP}_i$ -buffer, pH 7, 250 mM NaCl,  $\lambda_{\text{exc}} = 505 \text{ nm}$ .

## DNA9-10

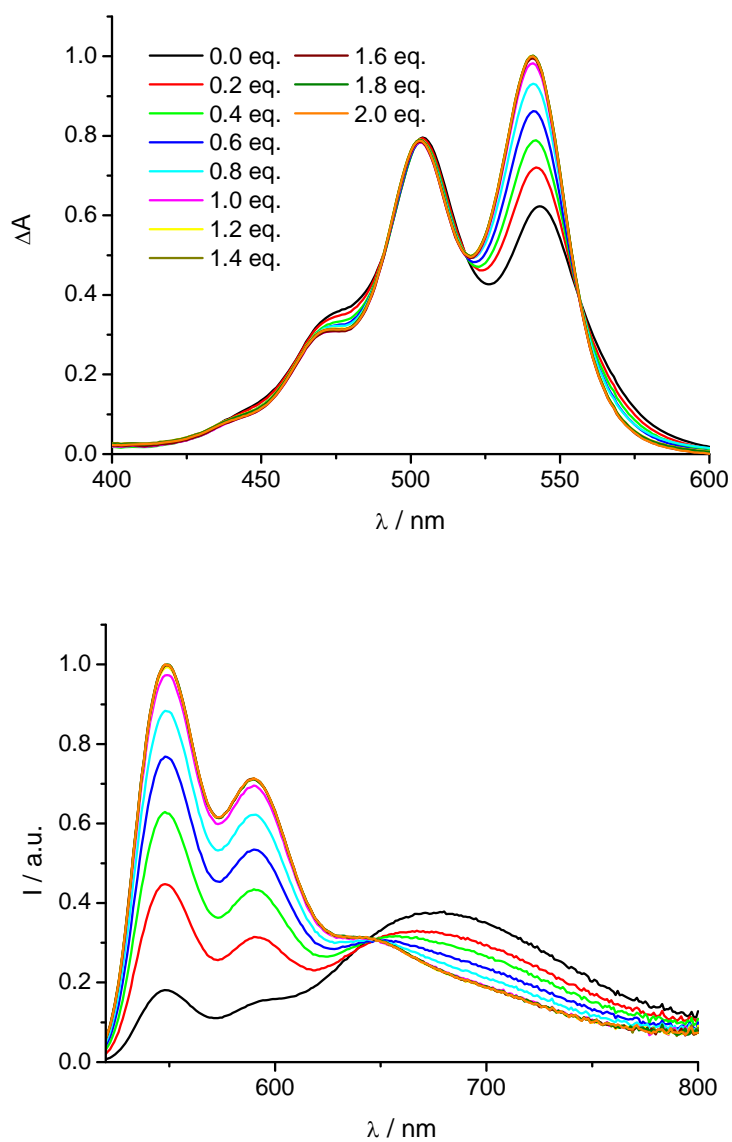

**Fig. S3** Normalized UV/Vis absorption (top) and emission spectra of the titration of **DNA9** with **DNA10**, 2.5  $\mu\text{M}$  DNA in 10 mM  $\text{NaP}_i$ -buffer + 40 vol-% EtOH, pH 7, 250 mM NaCl,  $\lambda_{\text{exc}} = 505 \text{ nm}$ .

### DNA2-6 + 40 vol-% EtOH

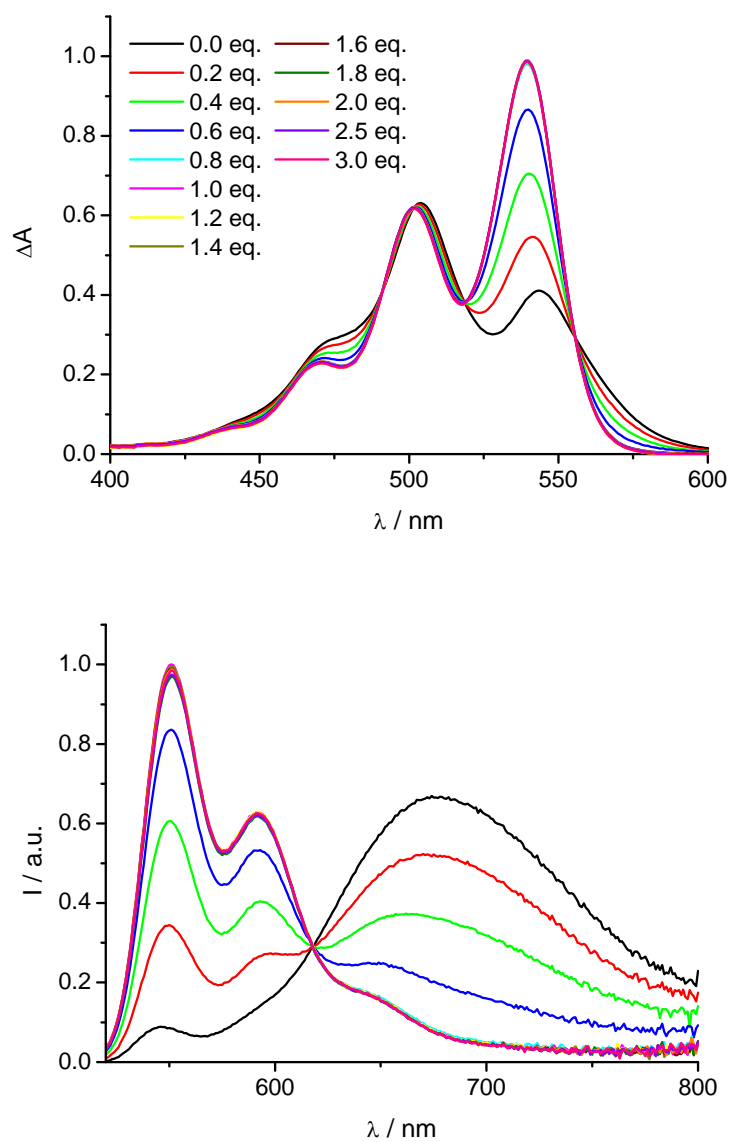

**Fig. S4** Normalized UV/Vis absorption (top) and emission spectra of the titration of **DNA2** with **DNA6**, 2.5  $\mu\text{M}$  DNA in 10 mM  $\text{NaP}_i$ -buffer + 40 vol-% EtOH, pH 7, 250 mM NaCl,  $\lambda_{\text{exc}} = 505$  nm.

## DNA9-10 + 40 vol-% EtOH

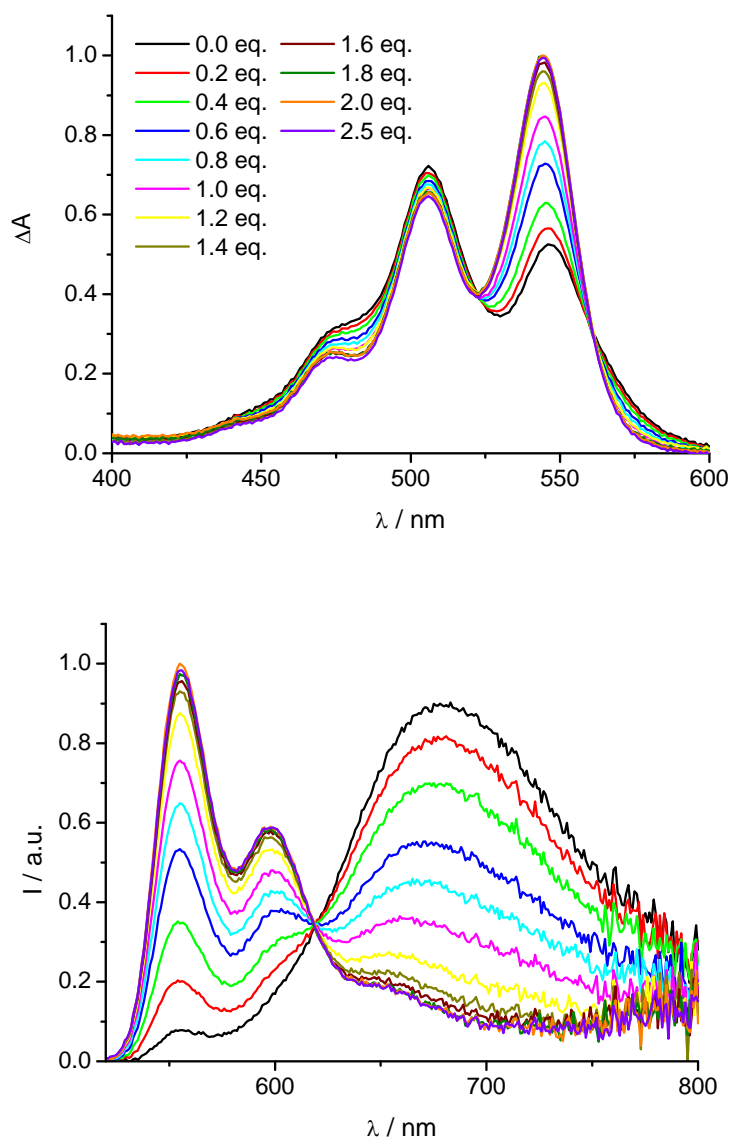

**Fig. S5** Normalized UV/Vis absorption (top) and emission spectra of the titration of **DNA9** with **DNA10**, 2.5  $\mu\text{M}$  DNA in 10 mM  $\text{NaP}_i$ -buffer + 40 vol-% EtOH, pH 7, 250 mM NaCl,  $\lambda_{\text{exc}} = 505$  nm.

**Table S1** Melting temperatures ( $T_m$ ) of the hairpin **DNA9** and the corresponding full duplex.<sup>a</sup>

| hairpin                 | $T_m$ ( $^{\circ}\text{C}$ ) | full duplex                | $T_m$ ( $^{\circ}\text{C}$ ) | $\Delta T_m$ ( $^{\circ}\text{C}$ ) |
|-------------------------|------------------------------|----------------------------|------------------------------|-------------------------------------|
| <b>DNA9</b>             | 46.2                         | <b>DNA9-10</b>             | 64.5                         | +18.3                               |
| <b>DNA9<sup>b</sup></b> | 23.7                         | <b>DNA9-10<sup>b</sup></b> | 42.8                         | +19.1                               |

<sup>a</sup>  $\lambda = 260$  nm, 20-90  $^{\circ}\text{C}$ , interval: 0.7  $^{\circ}\text{C}/\text{min}$ , 2.5  $\mu\text{M}$  DNA in 10 mM  $\text{NaP}_i$ -buffer (pH 7.0), 250 mM NaCl. <sup>b</sup>In the presence of 40 vol-% ethanol in the buffer solution.

## Kinetics of hairpin opening

### DNA2 in NaP<sub>i</sub>-buffer

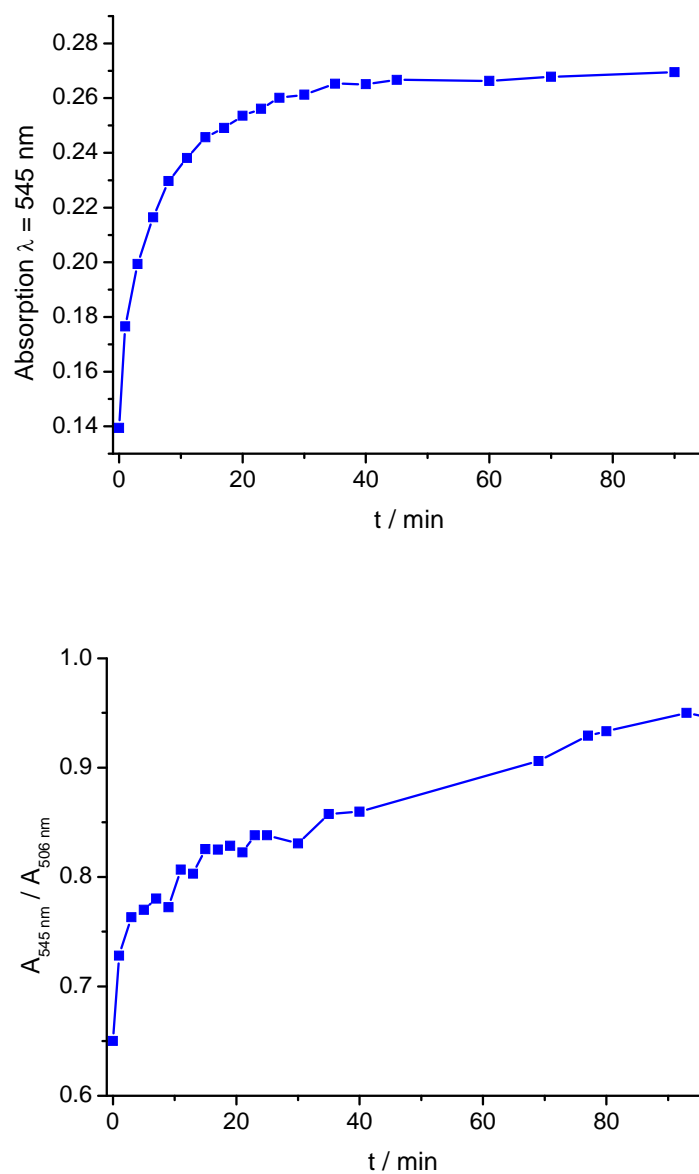

**Fig. S6** Time dependent observation of the absorption ( $\lambda = 545$  nm; top) and the absorption ratio ( $A_{545} / A_{506}$ ; bottom) of DNA2 after addition of 0.5 eq. of DNA5, 2.5  $\mu$ M DNA in 10 mM NaP<sub>i</sub>-buffer, pH 7, 250 mM NaCl.

## DNA2 and DNA9 in NaPi-buffer + 40 vol-% EtOH

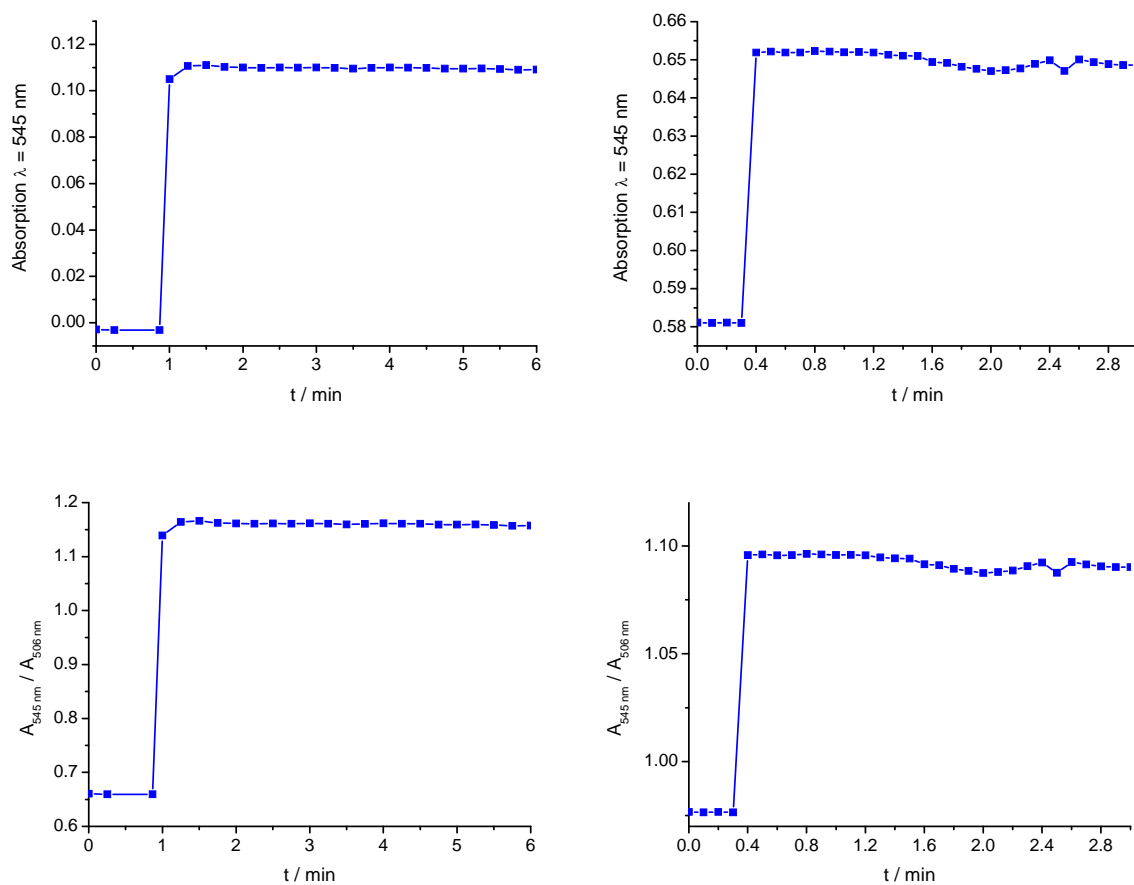

**Fig. S7:** Time dependent observation of the absorption ( $\lambda = 545$  nm; top line) and the absorption ratio ( $A_{545} / A_{506}$ ; bottom line) of **DNA2** after addition of 0.5 eq. of **DNA5** (top left), and **DNA9** (top right) after addition of 0.5 eq. of **DNA10** (right), 2.5  $\mu\text{M}$  DNA in 10 mM NaPi-buffer + 40 vol-% EtOH, pH 7, 250 mM NaCl.
